# Supplementary material
Source: PubMed Central journal article supplement (PMC3058981)

## SUPPLEMENTAL FIGURE LEGENDS

**Supplemental Figure 1. The Cre transgene does not affect baseline cardiac phenotype or the response to TAC under the conditions of our assays.** The ratio of heart weight to body weight (HW/BW) is presented for  $\alpha\text{MHC-Cre}^{-/-} \times \text{Fstl3}^{+/+}$  and  $\alpha\text{MHC-Cre}^{+/+} \times \text{Fstl3}^{+/+}$  mice.  $P > 0.05$  comparing cre-positive versus cre-negative mice at baseline or following TAC. However, TAC led to significant increases in HW/BW in both strains of mice.  $P < 0.05$ .

**Supplemental Figure 2. *Fstl3*-deficiency does not affect other Smad signaling.** Phosphorylation of Smad1/5 (P-Smad1/5)(A) in the hearts of WT and KO mice at 1 week after sham operation or TAC. Representative blots of phosphorylated and total Smad1/5 are shown. Lower panels show quantitative analysis of Smad1/5 phosphorylation. Relative phosphorylated levels of Smad1/5 were normalized to control values in sham-WT mice (n=6 to 12 hearts in each group). B and C, Myocardial expression of Smad4 (B) and Smad6 (C) protein in WT and KO mice at 1 week after TAC as measured by western blot analysis. Representative blots for Smad4, Smad6 and GAPDH are shown. Band intensities were normalized to control values in sham-WT mice (n=6 to 12 hearts in each group). \* $P < 0.05$  versus corresponding sham and # $P < 0.05$  versus WT mice.

**Supplemental Figure 3. Adenovirus mediated *Fstl3* overexpression, by itself, does not affect cardiac hypertrophy in vitro.** A, Quantitative analysis of cell surface area after transduction with Ad-Fstl3 or Ad- $\beta$ gal (control) followed by PE stimulation. B, Representative fluorescence microscope images of NRVMs transfected with Ad-Fstl3 or Ad- $\beta$ gal in the absence or presence of PE. C and D, The results of real-time-PCR analysis of ANF(C) and BNP(D) expression with adenoviral vector expressing (Ad-Fstl3) or  $\beta$  galactosidase (Ad- $\beta$ gal, control) for 8 hours in the presence or absence of PE (100 $\mu$ mol/L) for 24 hours. \* $P < 0.05$  versus corresponding control without PE.

**Supplemental Figure 4. The effects of Smad2 overexpression on myocyte hypertrophy.** Transduction with an adenoviral vector expressing Smad2 inhibits PE-induced myocyte hypertrophy but does affect the cell surface area of myocytes at baseline. \* $P < 0.05$  versus corresponding control without PE.

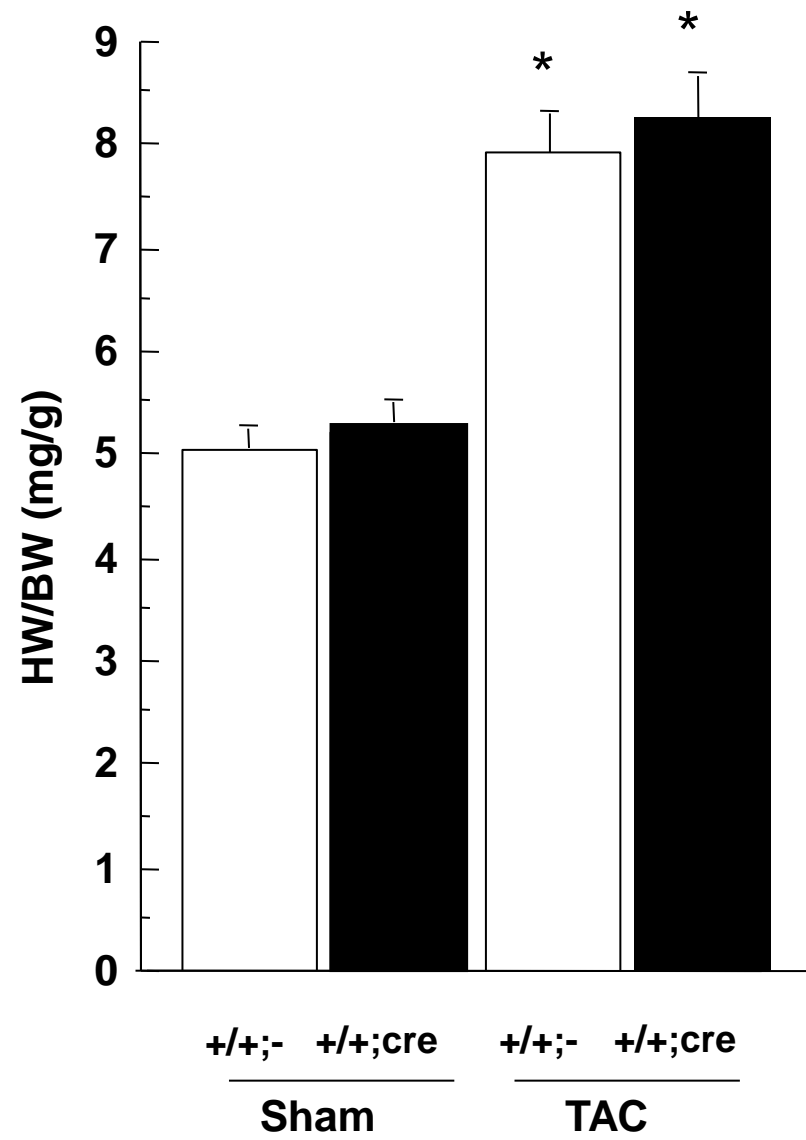

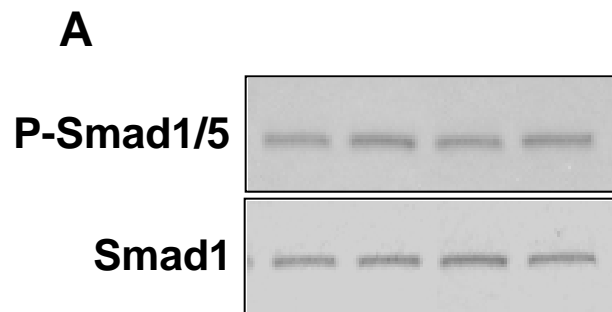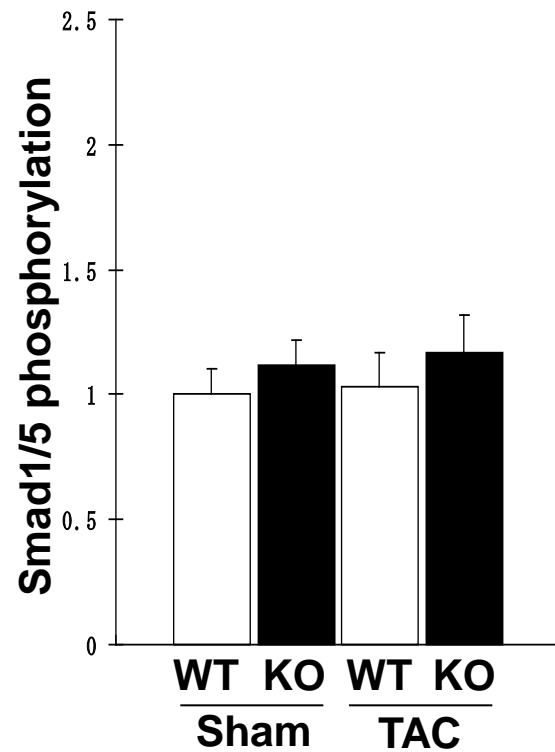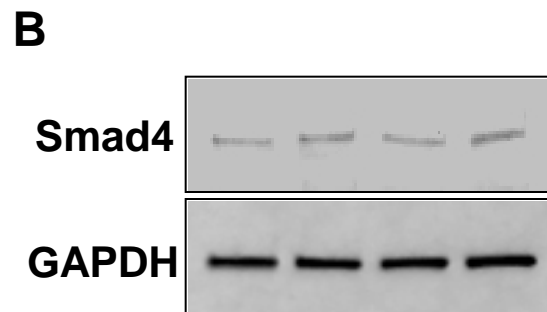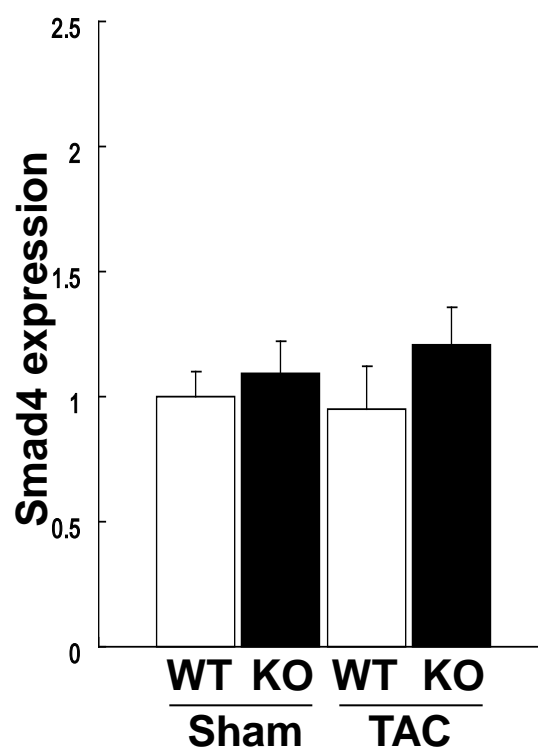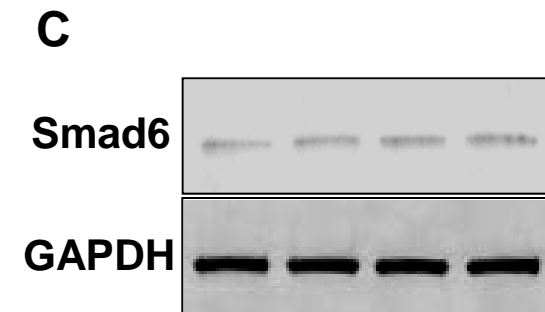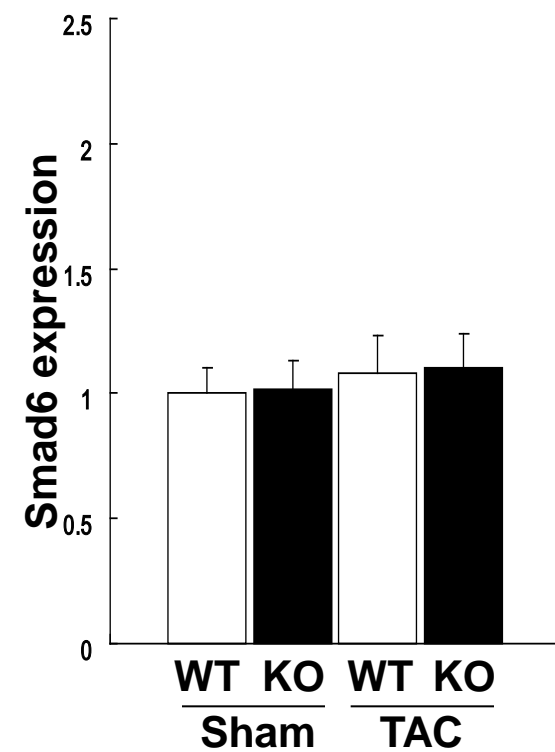

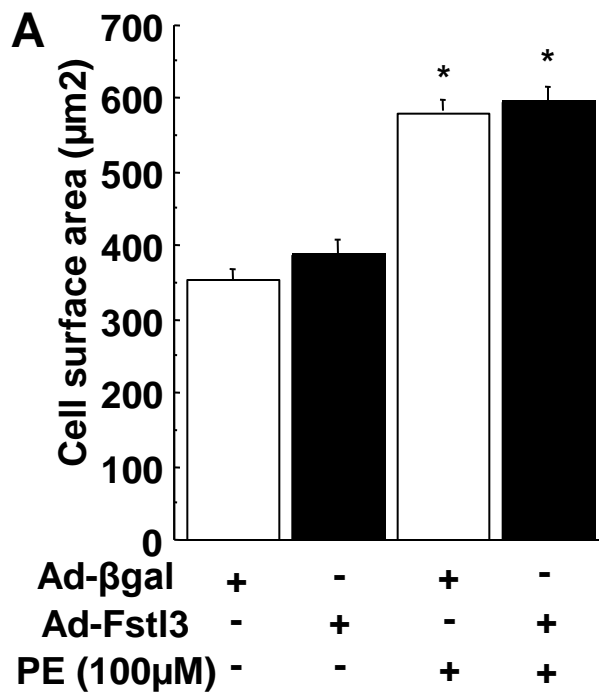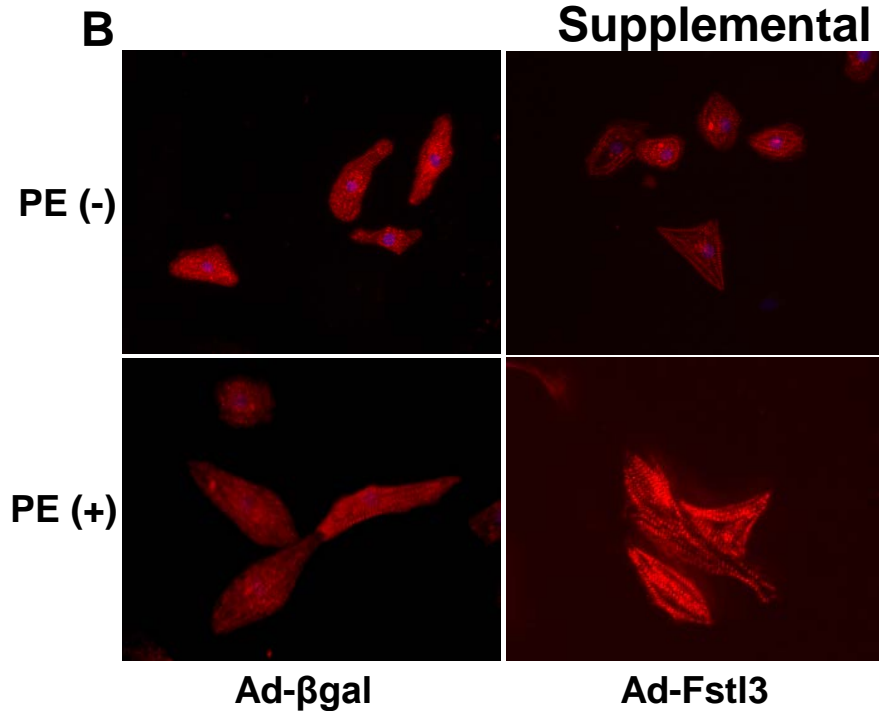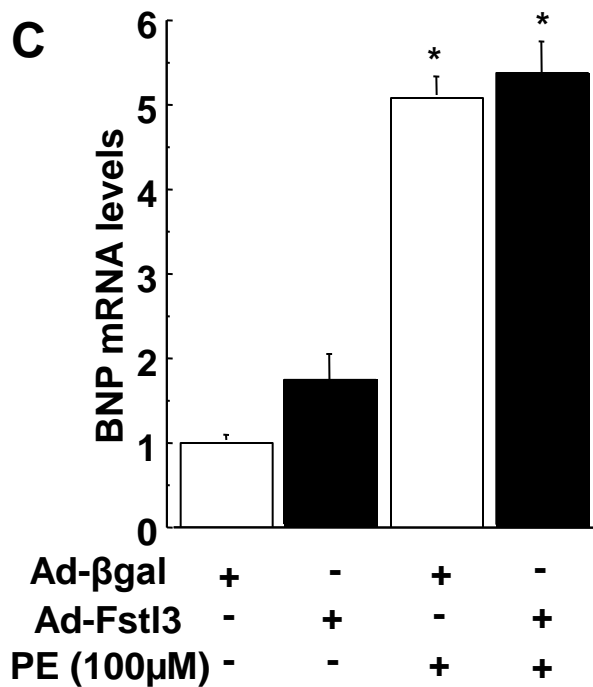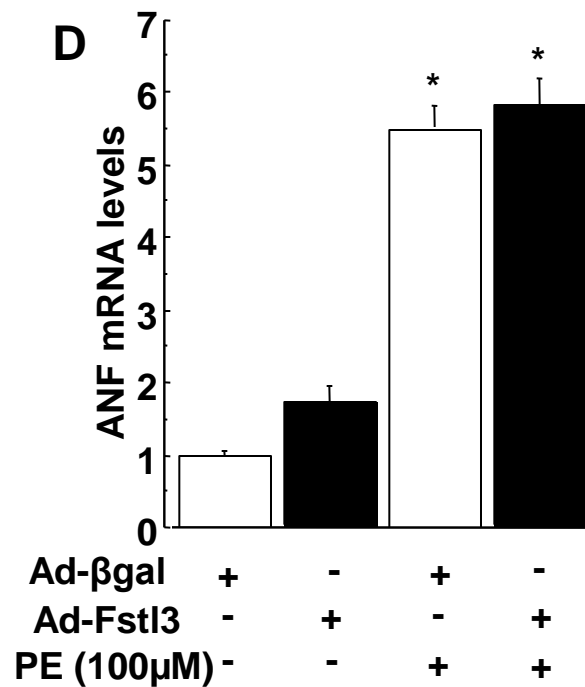

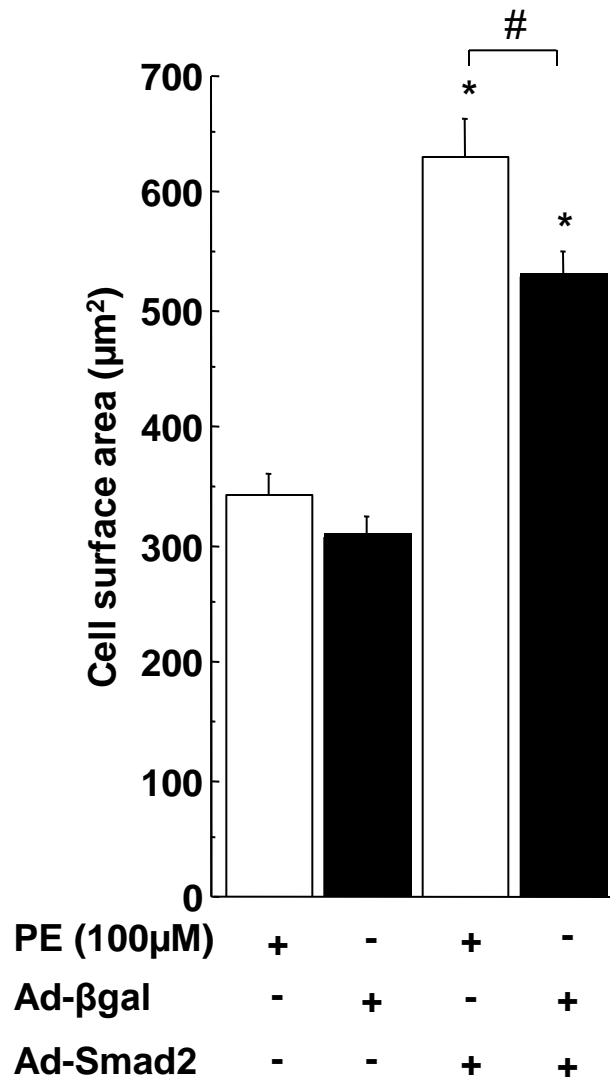

Supplement: supp_M110.197079_jbc.M110.197079-1.pdf [file supp_M110.197079_jbc.M110.197079-1.pdf]
